# Supplementary material
Source: PubMed Central journal article supplement (PMC6551206)
Supplement: NIHMS941631-supplement-3.pdf [file NIHMS941631-supplement-3.pdf]

**Table S1. Cause-specific hazard ratios of time to first AVF use (with follow-up through the end of 2014).**

|                                                           | Hazard Ratio | 95% Confidence Interval |             |
|-----------------------------------------------------------|--------------|-------------------------|-------------|
|                                                           |              | Lower Bound             | Upper Bound |
| Age                                                       |              |                         |             |
| 0-21                                                      | 1.11         | 0.95                    | 1.30        |
| 22-44                                                     | 1.06         | 1.02                    | 1.10        |
| 45-64                                                     | Ref.         |                         |             |
| 65-74                                                     | 0.93         | 0.90                    | 0.95        |
| 75+                                                       | 0.89         | 0.86                    | 0.92        |
| Race                                                      |              |                         |             |
| Native American                                           | 1.18         | 1.06                    | 1.31        |
| Asian                                                     | 1.14         | 1.07                    | 1.21        |
| White                                                     | Ref.         |                         |             |
| Black                                                     | 0.88         | 0.85                    | 0.90        |
| Other/Unknown                                             | 1.02         | 0.73                    | 1.44        |
| Sex                                                       |              |                         |             |
| Female                                                    | 0.74         | 0.72                    | 0.76        |
| Male                                                      | Ref.         |                         |             |
| Comorbidities present at incidence                        |              |                         |             |
| Cardiovascular disease                                    | 0.95         | 0.92                    | 0.97        |
| Peripheral arterial disease                               | 0.90         | 0.87                    | 0.94        |
| Hypertension                                              | 1.08         | 1.04                    | 1.12        |
| Diabetes*                                                 | 0.94         | 0.92                    | 0.97        |
| Tobacco use                                               | 0.99         | 0.94                    | 1.04        |
| Drug/alcohol use                                          | 0.92         | 0.84                    | 1.01        |
| Needs assistance (inc. being unable to ambulate/transfer) | 0.90         | 0.87                    | 0.94        |
| Institutionalized                                         | 0.90         | 0.86                    | 0.95        |
| Dialysis vintage (time on dialysis)                       |              |                         |             |
| < 1 year                                                  | Ref.         |                         |             |
| 1 – <2 years                                              | 0.89         | 0.85                    | 0.93        |
| 2 - <3 years                                              | 0.91         | 0.86                    | 0.96        |
| 3 - <6 years                                              | 0.87         | 0.83                    | 0.91        |
| 6+ years                                                  | 0.86         | 0.82                    | 0.90        |
| Vascular access type at incidence                         |              |                         |             |
| AV Fistula                                                | 1.33         | 1.25                    | 1.41        |
| AV Graft                                                  | 0.79         | 0.71                    | 0.87        |
| Catheter with maturing fistula                            | 1.07         | 1.04                    | 1.11        |
| Catheter with maturing graft                              | 0.74         | 0.66                    | 0.83        |
| Catheter only                                             | Ref.         |                         |             |
| Other/Unknown                                             | 0.97         | 0.93                    | 1.02        |
| ESRD Network                                              |              |                         |             |
| 11                                                        | 1.17         | 1.12                    | 1.22        |
| 16                                                        | 1.08         | 1.01                    | 1.16        |
| 18                                                        | 1.06         | 1.02                    | 1.11        |
| 17                                                        | 1.05         | 1.00                    | 1.11        |
| 6                                                         | 1.04         | 1.00                    | 1.08        |
| 15                                                        | 1.04         | 0.99                    | 1.10        |
| 14                                                        | 1.03         | 0.99                    | 1.07        |
| 8                                                         | 1.01         | 0.96                    | 1.05        |
| 7                                                         | 1.00         | 0.95                    | 1.05        |
| 1                                                         | 0.99         | 0.93                    | 1.05        |
| 5                                                         | 0.99         | 0.94                    | 1.03        |
| 2                                                         | 0.97         | 0.92                    | 1.02        |
| 12                                                        | 0.97         | 0.91                    | 1.02        |
| 13                                                        | 0.97         | 0.92                    | 1.02        |
| 4                                                         | 0.95         | 0.89                    | 1.00        |
| 10                                                        | 0.95         | 0.90                    | 1.01        |
| 3                                                         | 0.89         | 0.84                    | 0.95        |
| 9                                                         | 0.89         | 0.85                    | 0.93        |

\*Includes diabetes as cause of ESRD. The hazard ratios for each network are relative to the mean effect of all networks (i.e., national average). A hazard ratio greater than 1.0 indicates higher chance of AVF maturation (i.e., the desirable outcome), and vice versa. Model is adjusted for all factors listed in table.
